# Supplementary material
Source: Springer Nature journal article supplement (https://www.springermedizin.de/resource/supplementary/12889_2012_5268_MOESM1_ESM.pdf/9495002)

Changhua County

Fangyuan

Dacheng

Yunlin County

Mailiao

Taisi

Sihhu

Kouhu

Penghu islets

Chiayi County

Dongshih

Budai

Beimen

Tainan County

Jiangjiyun

Cigu

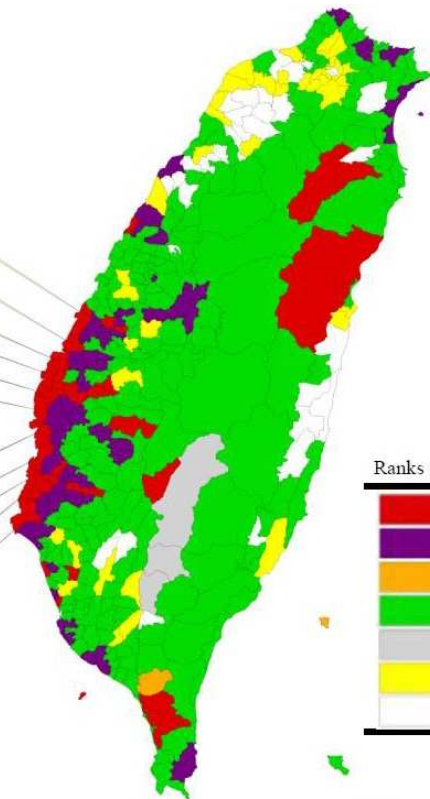

Ranks of male township-specific age-adjusted mortality

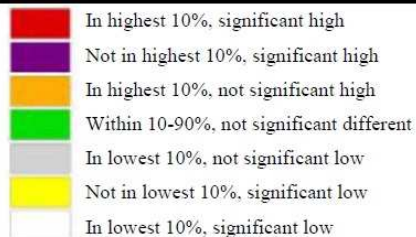

Supplement: MOESM1 [file 9495002]
